# Supplementary material for: The Framingham Risk Score Is Associated with Chronic Graft Failure in Renal Transplant Recipients
Source: MDPI journal article supplement (doi:10.3390/jcm10153287), 2021-07-26
Supplement: s1 [file s1]

## Supplemental Content

**Supplemental Table S1.** Number of patients at risk per risk group of the FRS.

| Years of Follow Up | Low Risk | Medium Risk | High Risk |
|--------------------|----------|-------------|-----------|
| 0                  | 147      | 151         | 300       |
| 2                  | 141      | 145         | 271       |
| 4                  | 137      | 135         | 239       |
| 6                  | 130      | 127         | 199       |
| 8                  | 119      | 113         | 167       |
| 10                 | 93       | 84          | 113       |
| 12                 | 0        | 0           | 0         |

**Supplemental Table S2.** Association of individual components of the FRS with chronic graft failure.

|                                    | Hazard Ratio | 95% CI    | <i>p</i> -Value |
|------------------------------------|--------------|-----------|-----------------|
| Age                                | 0.97         | 0.95-0.99 | 0.006           |
| Sex                                | 0.98         | 0.62-1.55 | 0.92            |
| Systolic blood pressure            | 1.02         | 1.00-1.02 | 0.002           |
| Smoking                            | 1.92         | 1.21-3.06 | 0.006           |
| Use of anti-hypertensives          | 1.02         | 0.50-2.08 | 0.95            |
| Diabetes                           | 1.19         | 0.64-2.20 | 0.58            |
| Concentration of HDL-C             | 0.97         | 0.94-0.99 | 0.003           |
| Concentration of total cholesterol | 1.00         | 1.00-1.01 | 0.41            |

Hazard ratios are computed by Cox proportional hazard regression. Abbreviations: HDL-C, high density lipoprotein cholesterol.
